# Supplementary material for: The methodological quality of animal research in critical care: the public face of science
Source: PubMed Central journal article supplement (PMC4126494; doi:10.1186/s13613-014-0026-8), 2014-07-29
Supplement: s13613-014-0026-8-S2.pdf [file s13613-014-0026-8-S2.pdf]

Study number: \_\_\_\_\_

Page 1 of 5

**Additional File 2:** Case Report Form for Methodological Quality of animal research study.

**Authors:** Meredith Bara BSc and Ari R Joffe MD, FRCPC

Title: \_\_\_\_\_

Journal: CCM, ICM, AJRCCM

Year; Volume: page numbers: \_\_\_\_\_

| <b>Variable</b>                      | <b>Data</b>               | <b>Comments</b>                                                                                                                                   |
|--------------------------------------|---------------------------|---------------------------------------------------------------------------------------------------------------------------------------------------|
| <b>Title:</b> accurate and concise   | Yes or No                 | If no: randomization; blinding; intervention; other.                                                                                              |
| <b>Abstract:</b> accurate            | Yes or No                 | If no:<br>-Omission: background, objectives, methods, results, conclusions<br>-Inaccuracy: background, objectives, methods, results, conclusions. |
| <b>Introduction:</b>                 | -                         | -                                                                                                                                                 |
| Objectives/hypotheses in PICO format | Yes or No                 | -                                                                                                                                                 |
| <b>Number of animals used</b>        | -                         | -                                                                                                                                                 |
| Stated in methods section            | _____                     | -                                                                                                                                                 |
| Any extra in results section         | Yes or No                 | If yes: answer bullets below                                                                                                                      |
| -how many more                       | _____                     | If number not clear: <5, 5 or more, unclear.                                                                                                      |
| Number in the largest group          | _____                     | -                                                                                                                                                 |
| <b>Methods:</b>                      | -                         | -                                                                                                                                                 |
| <b>Design:</b>                       | -                         | -                                                                                                                                                 |
| Randomized                           | Yes or No                 | If no: alternation; dates; picked out of cage; historical control; not specified, other _____<br>If yes: answer the bullets below                 |
| -Procedure described                 | Yes or No                 | Table; computer; other _____                                                                                                                      |
| -Block randomization                 | Yes or No                 | If yes: size of blocks: _____                                                                                                                     |
| -Stratified randomization            | Yes or No                 | If yes: number of characteristics _____                                                                                                           |
| -Factorial                           | Yes or No                 | If yes: number of factors _____                                                                                                                   |
| -Allocation concealment              | Yes or No                 | If yes: third party; envelopes; other _____                                                                                                       |
| Blinding                             | Yes or No                 | If yes: answer the bullets below.                                                                                                                 |
| -disease induction                   | Yes, No, N/A, or Unclear  | -                                                                                                                                                 |
| -treatment/intervention              | Yes, No, Some, or Unclear | -                                                                                                                                                 |
| -outcome assessment                  | All, Some, or None        | If none or some: any subjective outcomes not blinded- Yes or No                                                                                   |
| Experimental Unit                    | Yes or No                 | Group; Individual; Part of individual                                                                                                             |
| Eligibility criteria                 | Yes or No                 | -                                                                                                                                                 |
| <b>Study procedures:</b>             | -                         | -                                                                                                                                                 |
| Sepsis model                         | Yes or No                 | If yes: answer the bullets below.                                                                                                                 |

|                                            |                      |                                                                                                                                                |
|--------------------------------------------|----------------------|------------------------------------------------------------------------------------------------------------------------------------------------|
| -supportive therapy                        | Yes or No            | If yes: fluids; antibiotics; other                                                                                                             |
| -intercurrent illnesses                    | Yes or No            | If yes: describe _____                                                                                                                         |
| -model relevance                           | -                    | Focal or bolus; $\leq$ or $>$ 24 hours; treatment intervention is pre- or post-sepsis induction                                                |
| Preparation prior to experiment            | Yes or No            | If yes: acclimation; habituation; quarantine                                                                                                   |
| Staff description                          | Yes or No            | If yes: number; training in induction; intervention; monitoring; outcome                                                                       |
| <b>Animal description:</b>                 | -                    | -                                                                                                                                              |
| Species                                    | Yes or No            | _____                                                                                                                                          |
| Strain                                     | Yes or No            | -                                                                                                                                              |
| Sex                                        | Yes or No            | -                                                                                                                                              |
| Age                                        | Yes or No            | -                                                                                                                                              |
| Developmental stage                        | Yes or No            | If yes: neonate; juvenile; adult                                                                                                               |
| Weight                                     | Yes or No            | -                                                                                                                                              |
| Strain, sex, and either weight or age      | Yes or No            | -                                                                                                                                              |
| Source                                     | Yes or No            | If yes: commercial or local; colony; transport; previous use                                                                                   |
| Genotype                                   | Yes or No            | -                                                                                                                                              |
| <b>Statistics:</b>                         | -                    | -                                                                                                                                              |
| Sample size calculated                     | Yes or No            | If cluster trial: cluster adjustment YorN<br>If sample size calculated: explicit mention of alpha, beta/power, minimally important difference. |
| Primary outcome specified                  | Yes or No            | If yes: answer the bullets below.                                                                                                              |
| -number of primary outcomes                | -                    | Number _____                                                                                                                                   |
| -statistical method specified              | Yes or No            | -                                                                                                                                              |
| Secondary outcomes specified               | Yes or No            | If yes: answer the bullets below.                                                                                                              |
| -number of secondary outcomes              | -                    | Number: none, $<5$ , 5-10, $>10$ .                                                                                                             |
| -statistical methods specified             | Yes or No            | -                                                                                                                                              |
| Sub-groups to be analyzed?                 | Yes or N/A           | If yes: answer the bullets below.                                                                                                              |
| -how many?                                 | -                    | Number _____                                                                                                                                   |
| <b>Results:</b>                            | -                    | -                                                                                                                                              |
| baseline characteristics compared in table | Yes or No            | If yes: answer the bullets below.                                                                                                              |
| -at least two demographics                 | Yes or No            |                                                                                                                                                |
| -at least two physiology                   | Yes or No            |                                                                                                                                                |
| Primary outcome analyzed                   | Yes or No or N/A     | If yes: answer the bullets below.                                                                                                              |
| -numbers with denominators                 | Yes or No            | -                                                                                                                                              |
| -unaccounted numbers                       | Yes, No, or Unclear  | -                                                                                                                                              |
| -any excluded from analysis                | Yes or No or Unclear | If yes: number stated; reasons stated                                                                                                          |

|                                                          |                      |                                                                                 |
|----------------------------------------------------------|----------------------|---------------------------------------------------------------------------------|
| -numbers in tables/graphs                                | Yes or No            | -                                                                               |
| -all pre-specified reported                              | Yes or No            | If no: number not reported _____                                                |
| -measure of precision                                    | Yes or No            | If yes: CI; SD; SE                                                              |
| -absolute and relative effect                            | Yes or No            | -                                                                               |
| -number positive outcome                                 | -                    | Number _____                                                                    |
| -number negative or neutral outcome                      | -                    | Number _____                                                                    |
| -intention to treat analysis                             | Yes or No            | -                                                                               |
| -pre-specified subgroups analyzed                        | Yes or No or N/A     | If yes: test of interaction done YorN                                           |
| -post-hoc subgroups analyzed                             | Yes or N/A           | If yes: number _____; test of interaction done YorN                             |
| Secondary outcomes analyzed                              | Yes or No            | If yes: answer the bullets below as they apply to the majority of the outcomes. |
| -numbers with denominators for most                      | Yes or No            | -                                                                               |
| -unaccounted numbers                                     | Yes or No or Unclear | -                                                                               |
| -any excluded from analysis                              | Yes or No or Unclear | If yes: number stated; reasons stated                                           |
| -numbers in most tables/graphs                           | Yes or No            | -                                                                               |
| -all pre-specified important outcomes reported           | Yes or No            | -                                                                               |
| -measure of precision                                    | Yes or No            | If yes: CI; SD; SE                                                              |
| -absolute and relative effect                            | Yes or No            | -                                                                               |
| -mostly positive outcomes                                | Yes or No            | -                                                                               |
| -any negative outcome (obvious, or explicitly stated)    | Yes or No            | -                                                                               |
| -number post-hoc outcomes (not pre-specified in methods) | -                    | Number: none; <5; 5-10; >10                                                     |
| -number of statistical comparisons                       | -                    | <5; 5-20; 21-40; >40                                                            |
| -pre-specified subgroups analyzed                        | Yes or No or N/A     | If yes: number _____; test of interaction done YorN                             |
| -post-hoc subgroups analyzed                             | Yes or N/A           | If yes: number _____; test of interaction done YorN.                            |
| Any toxicity or lack of toxicity mentioned or reported   | Yes, No, or N/A      | -                                                                               |
| <b>Discussion:</b>                                       | -                    | -                                                                               |
| Internal validity: limitations discussed                 | Yes or No            | If yes: sample size; bias; multiple comparisons.                                |
| External validity: to humans discussed                   | Yes or No            | If yes: any limitation to generalizing to humans mentioned- Yes or No or Vague  |
| Funding source described                                 | Yes or No            | If yes: answer the bullets below.                                               |
| -government source                                       | Yes or No            | -                                                                               |

|                                    |                 |   |
|------------------------------------|-----------------|---|
| -foundation charity                | Yes or No       | - |
| -industry company                  | Yes or No       | - |
| -any role in analysis or reporting | Yes or No or NR | - |
| <b>Any Comments:</b>               |                 |   |

**Notes:**

- circle correct response for Yes or No
- circle all that apply for sub-questions in last column
- fill in underlined space as applicable with numbers or names
